# Supplementary figures and images for: Investigating Ecological Momentary Assessed Physical Activity and Core Executive Functions in 18- to 24-Year-Old Undergraduate Students
Source: MDPI journal article supplement (doi:10.3390/ijerph20206944), 2023-10-19

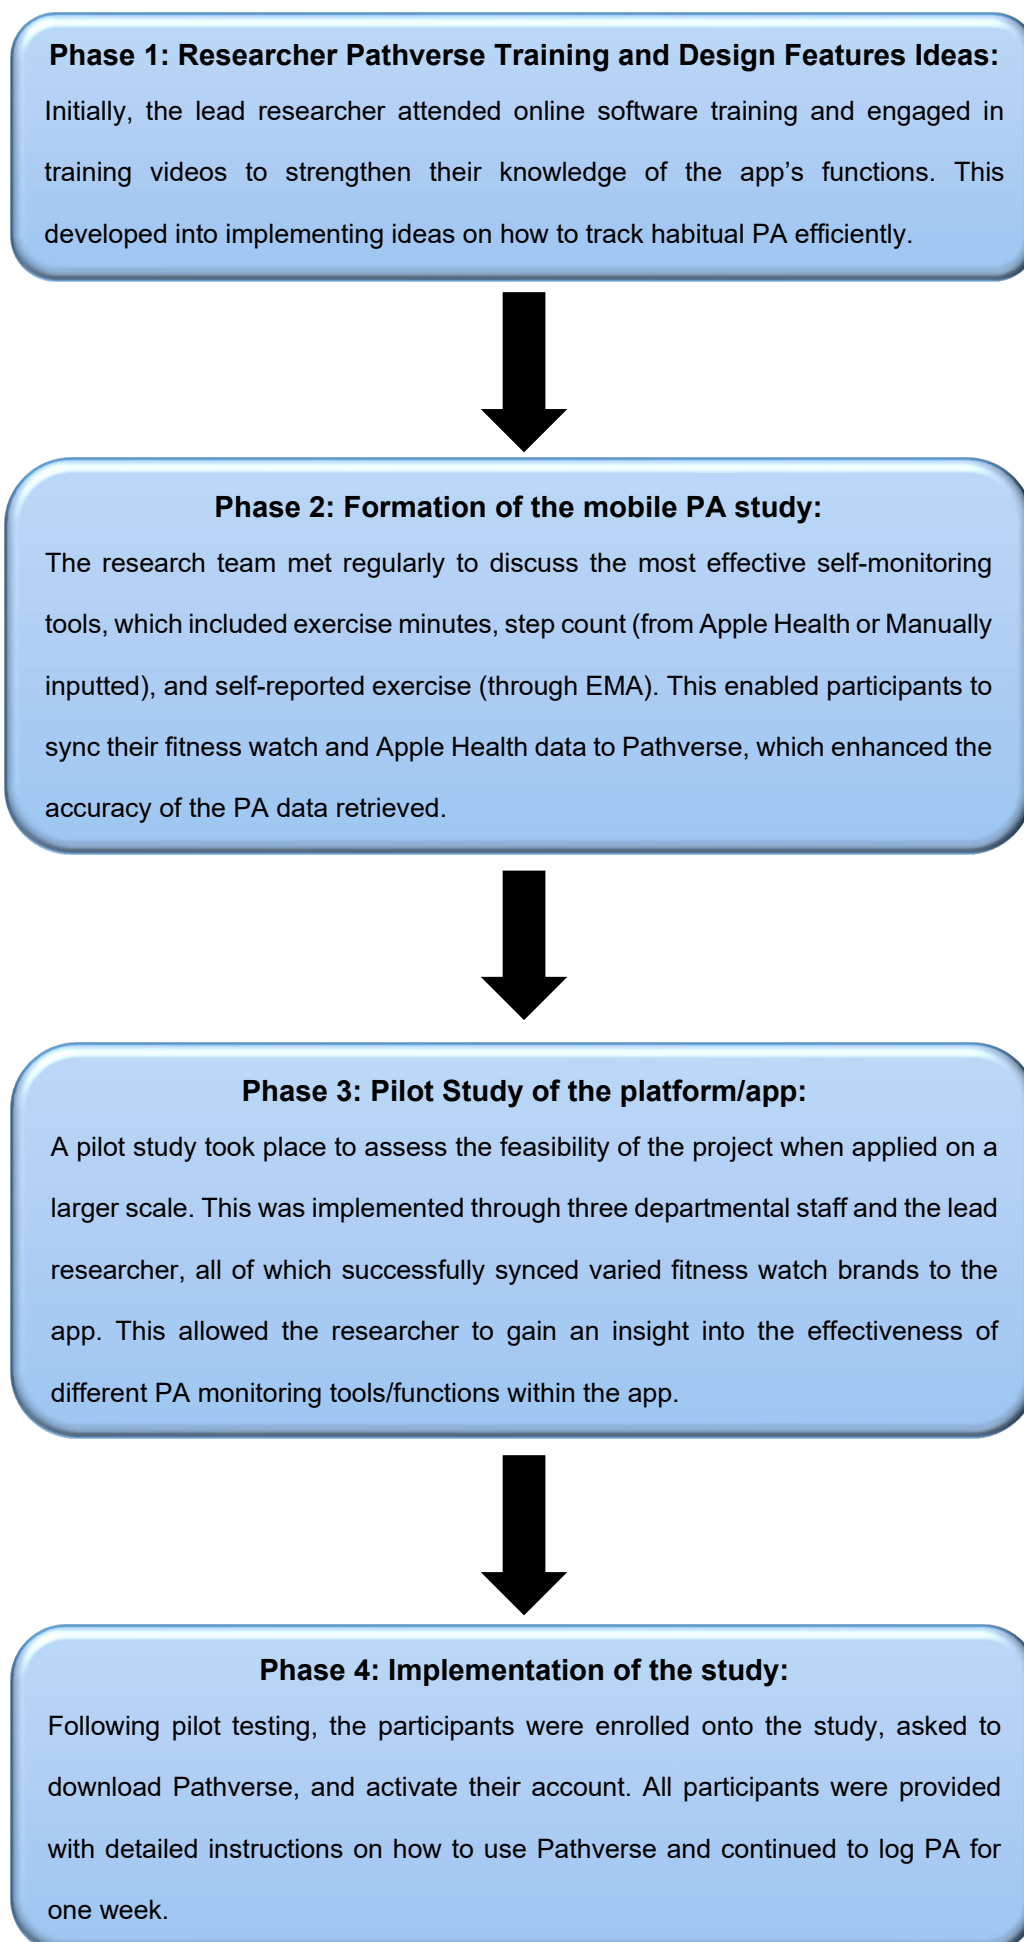

**Figure S1.** Pathverse Online Study Development Phases.

Supplement: s1 [file s1]
